# Supplementary material for: Bacterial communities associated with cell phones and shoes
Source: PeerJ. 2020 Jun 9;8:e9235. doi: 10.7717/peerj.9235 (PMC7292020; doi:10.7717/peerj.9235)
Supplement: Table S1 [file peerj-08-9235-s002.xlsx]

## Sheet: Sheet1
Description	Object in R	# of unique ASVs	Samples	Mean # of ASVs per Sample	Standard deviation	Figures
Submitted to SRA			2234
Raw from DADA2		227629	2234
Removed Samples with incomplete metadata	ps	227629	2230	75064.9	70470
Select FOR Bacteria and against Mitochondria and Chloroplast	ps0.redo	148535	2230	58197.1	56082.2
Remove Unknown Samples and 0 read Samples	ps0.redo.cpr.2	148535	2103	49952.2	50409.2
Rarefy the samples to 10k ASVs	ps0.redo.cpr.rar	103638	1755	10000	0
Select for only samples of Type shoe	ps0.redo.cpr.rar.shoe	103638	912	10000	0
Select for only samples of Type phone	ps0.redo.cpr.rar.phone	103638	843	10000	0
Select the samples from shoe that also appear in phone	ps0.redo.cpr.rar.paired.shoe	103638	637	10000	0
Select the samples from phone that also appear in shoe	ps0.redo.cpr.rar.paired.phone	103638	637	10000	0
Merge of the two previous datasets	ps0.redo.cpr.rar.paired	103638	1274	10000	0	Figure 1
Keep ASVs only present in >5% of Samples	ps0.redo.cpr.prev	2257	2103	40086	41543
Rarefy the samples to 10k ASVs	ps0.redo.cpr.prev.rar	2253	1672	10000	0	Figures 2,3
Select the samples from shoe that also appear in shoe	ps0.redo.cpr.prev.rar.shoe	2253	578	10000	0
Select the samples from shoe that also appear in phone	ps0.redo.cpr.prev.rar.phone	2253	578	10000	0
Merge shoe Samples by Event Location	ps0.redo.cpr.rar.phone.event.2	2253	34	211460	170000	Figure 4
Merge phone Samples by Event Location	ps0.redo.cpr.rar.shoe.event.2	2253	34	211460	170000
