# Supplementary material for: Bacterial communities associated with cell phones and shoes
Source: PeerJ. 2020 Jun 9;8:e9235. doi: 10.7717/peerj.9235 (PMC7292020; doi:10.7717/peerj.9235)
Supplement: Table S2 — “Age” is a rough approximation based on attendees of the event (A = Adult, K = Kid, M = Mixed). “ n =” refers to the number of samples that were actually sequenced. “Event title or location” is how the samples are referenced in the data files. [file peerj-08-9235-s003.xlsx]

## Sheet: Sheet1
Age	City	State	# of samples	Date	Event title or Location	Description
Adult	Palmdale	CA	19	2013-07-19	TeachersInSpace	Teachers in Space summer workshop at Aero Institute
Kid	San Diego	CA	14	2013-08-24	PWCoronado	Pop Warner Cheer Organization: Coronado Islanders
Kid	Monrovia	CA	31	2013-09-24	Wildrose	Wildrose Elementary School
Kid	Castro Valley	CA	12	2013-09-29	PWGladiators	Pop Warner Cheer Organization: Castro Valley Gladiators
Mixed	San Francisco	CA	147	2013-11-02	BASF	Bay Area Science Festival
Adult	Denver	CO	33	2013-05-08	DMNS	Denver Museum of Nature and Science
Kid	Fountain	CO	37	2013-10-10	ColeMiddle	Cole Middle School
Adult	Washington	DC	13	2013-04-12	YNDC	Yuri's Night party at Science Club in Washington D.C.
Mixed	Washington	DC	50	2013-09-14	SmithsonianAirSpace	Women in Space Day/Smithsonian Museum of Air and Space
Mixed	Washington	DC	280	2014-04-25	SciEngFest	USA Science and Engineering Festival
Adult	Fort Lauderdale	FL	16	2013-08-14	Broward	STEM Teacher Event
Kid	Orlando	FL	40	2013-09-07	PWBrantley	Pop Warner Cheer Organization: Lake Brantley Patriots
Adult	Miami	FL	28	2013-09-25	MiamiDolphins	Miami Dolphins NFL football game
Kid	Atlanta	GA	33	2013-04-27	Girl Scouts	Girl Scouts at Atlanta Science Festival
Kid	Potlatch	ID	25	2013-10-10	Potlatch	Potlatch Junior High School
Adult	Longmeadow	MA	10	2013-09-26	Tufts	Tufts University Pediatric Infectious Diseases Hospital
Mixed	Baltimore	MA	24	2014-05-04	KidneyFoundation	Kidney Foundation Walk at the Baltimore Zoo
Adult	Columbia	MD	69	2013-06-09	HowardCCC	Howard County Community Challenge
Adult	Landover	MD	6	2013-10-29	Washington D.C. NFL	Washington D.C. NFL football game
Adult	Durham	NC	36	2013-04-12	YNNC	Yuri's Night party at Museum of Life and Science in Durham, NC
Adult	Durham	NC	246	2014-02-17	ScienceOnline	Science Online scientific conference - NC State University
Adult	New York	NY	40	2013-04-16	YNNY	Yuri's Night party at National Arts Club in New York, NY
Kid	Chittenango	NY	35	2013-09-04	PWBears	Pop Warner Cheer Organization: Chittenango Bears
Adult	Tulsa	OK	78	2013-09-11	TulsaCCBio	Tulsa Community College Bio Class Project
Kid	Salem	OR	20	2013-10-04	ChapmanHill	Chapman Hill Elementary School
Mixed	Philadelphia	PA	5	2013-04-20	PhillyScienceFest	Philadelphia Science Festival 2013
Mixed	Philadelphia	PA	72	2013-04-25	PhilliesGame	Philadelphia Phillies MLB baseball game
Adult	Philadelphia	PA	10	2013-05-23	CHF	Chemical Heritage Foundation
Adult	Philadelphia	PA	3	2013-05-30	FranklinInstitute	The Franklin Institute
Adult	Philadelphia	PA	17	2013-06-04	PhillyANS	The Academy of Natural Sciences at Drexel University
Adult	Philadelphia	PA	72	2014-02-18	76ers	Science at the Sixers - Philadelphia 76ers NBA basketball game
Mixed	Philadelphia	PA	33	2014-04-26	DiscoveryDays	NaturePalooza - at The Schuylkill Center for Environmental Education
Mixed	Philadelphia	PA	23	2014-04-30	DrexelLibrary	Philadelphia Science Festival: Katharine Drexel Library
Mixed	Philadelphia	PA	171	2014-05-03	PhillySciFest	Philadelphia Science Festival 2014
Mixed	San Antonio	TX	84	2013-04-12	SPURS	San Antiono Spurs NBA basketball game
Mixed	Houston	TX	171	2014-04-14	YYCPA	Young Women's College Preparatory Academy
Kid	Unknown	Unknown	13	2014-04-23	KidScoop	Nationwide competition through KidScoop magazine
Mixed	Dulles	VA	70	2013-09-28	NSFSTEM	National Science Foundation, STEM Careers Fair; Dulles Town Center
