# Supplementary material for: Bacterial communities associated with cell phones and shoes
Source: PeerJ. 2020 Jun 9;8:e9235. doi: 10.7717/peerj.9235 (PMC7292020; doi:10.7717/peerj.9235)
Supplement: Table S3 — Shown in “%Cell” and “%Shoe” are the percentages of the samples containing particular ASVs found on cell phones or shoes. “Samples” is the total number of samples containing that ASV (of 2243 samples total). “Total” is the total number of samples in the dataset. “CellReads” and “ShoeReads” count the total number of reads containing ASVs at that taxonomic level, “CellTotal” and “ShoeTotal” count the total number of reads found in samples containing ASVs at that taxonomic level. “CellRelab” and “ShoeRlab” measure the relative abundance of those ASVs. [file peerj-08-9235-s004.xlsx]

## Sheet: Sheet1
ASV	%Cell	%Shoe	Samples	Total		CellReads	CellTotal	CellRelab	ShoeReads	ShoeTotal	ShoeRelab
Kingdom
Eukaryota	47	53	1797	2234		219469	50597412	0.00433755	321280	90377215	0.00355488
NA	37	63	1462	2234		132715	36475577	0.00363846	691728	89187394	0.00775589
Archaea	32	68	1181	2234		89892	26551550	0.00338557	127930	80267883	0.00159379
Bacteria	52	48	2223	2234		56040451	56482527	0.992173	91579435	92720348	0.987695
Phylum
Bacteria_Zixibacteria	39	61	23	2234		1209	1026511	0.00117778	557	1819727	0.00030609
Bacteria_Edwardsbacteria	100	0	1	2234		3	256792	1.17e-05	0	0	0
Bacteria_Elusimicrobia	26	74	259	2234		10238	6114367	0.00167442	8792	21260760	0.00041353
Bacteria_Cloacimonetes	25	75	4	2234		40	96976	0.00041247	134	625001	0.0002144
Bacteria_AncK6	100	0	2	2234		62	397519	0.00015597	0	0	0
Bacteria_Entotheonellaeota	25	75	360	2234		10541	6822947	0.00154493	9889	30259970	0.0003268
Bacteria_FCPU426	22	78	23	2234		291	469480	0.00061983	462	1795960	0.00025724
Archaea_Diapherotrites	0	100	1	2234		0	0	0	5	190933	2.62e-05
Bacteria_RsaHf231	11	89	103	2234		734	848604	0.00086495	6328	11743416	0.00053886
Bacteria_Patescibacteria	37	63	1041	2234		33269	28942935	0.00114947	33703	72433630	0.00046529
Bacteria_Hydrogenedentes	23	77	43	2234		1159	805004	0.00143974	371	4034011	9.2e-05
Bacteria_WS2	31	69	16	2234		272	701272	0.00038787	122	1692150	7.21e-05
Bacteria_Margulisbacteria	33	67	6	2234		673	65658	0.0102501	60	744070	8.06e-05
Bacteria_PAUC34f	50	50	2	2234		10	256792	3.89e-05	33	107037	0.0003083
Bacteria_GAL15	64	36	11	2234		334	910406	0.00036687	168	265594	0.00063254
Bacteria_Armatimonadetes	26	74	1068	2234		28979	22095051	0.00131156	95638	80081874	0.00119425
Bacteria_WS1	0	100	3	2234		0	0	0	193	382054	0.00050516
Bacteria_Coprothermobacteraeota	33	67	6	2234		317	142562	0.00222359	77	372128	0.00020692
Bacteria_WS4	26	74	34	2234		1050	1029322	0.00102009	423	3732837	0.00011332
Bacteria_WOR-1	0	100	1	2234		0	0	0	21	190933	0.00010999
Bacteria_Nitrospinae	31	69	13	2234		682	533854	0.0012775	990	1330713	0.00074396
Bacteria_Latescibacteria	29	71	278	2234		27567	5577142	0.00494285	13453	21197719	0.00063464
Bacteria_Omnitrophicaeota	36	64	50	2234		1839	1797556	0.00102306	1016	3735029	0.00027202
Bacteria_BRC1	11	89	352	2234		1658	3649412	0.00045432	12927	35537009	0.00036376
Archaea_Nanoarchaeaeota	32	68	71	2234		4695	1911972	0.00245558	5036	4331390	0.00116268
Bacteria_Atribacteria	50	50	6	2234		177	467558	0.00037856	27	241544	0.00011178
Bacteria_Calditrichaeota	0	100	4	2234		0	0	0	174	382601	0.00045478
Bacteria_WPS-2	16	84	404	2234		3156	5135655	0.00061453	10328	37895128	0.00027254
Bacteria_Rokubacteria	29	71	352	2234		19586	7304791	0.00268125	15647	27174634	0.00057579
Bacteria_Dadabacteria	10	90	10	2234		106	50706	0.00209048	74	1015373	7.29e-05
Bacteria_Caldiserica	50	50	4	2234		7	95167	7.36e-05	21	247879	8.47e-05
Bacteria_Dependentiae	20	80	356	2234		4665	5856589	0.00079654	8261	33711303	0.00024505
Bacteria_Acetothermia	0	100	2	2234		0	0	0	53	211228	0.00025091
Class
Bacteria_BRC1_NA	11	89	352	2234		1658	3649412	0.00045432	12927	35537009	0.00036376
Bacteria_Armatimonadetes_NA	17	83	351	2234		2477	6370592	0.00038882	6424	35791723	0.00017948
Bacteria_WS2_NA	31	69	16	2234		272	701272	0.00038787	122	1692150	7.21e-05
Bacteria_Armatimonadetes_Fimbriimonadia	20	80	796	2234		17520	12252480	0.00142991	56000	66728282	0.00083922
Bacteria_Entotheonellaeota_Entotheonellia	25	75	360	2234		10541	6822947	0.00154493	9889	30259970	0.0003268
Bacteria_Armatimonadetes_Armatimonadia	20	80	759	2234		7929	13402729	0.0005916	29147	64866940	0.00044934
Bacteria_Nitrospinae_P9X2b3D02	33	67	12	2234		682	533854	0.0012775	985	1010090	0.00097516
Bacteria_Latescibacteria_NA	29	71	264	2234		26787	5445647	0.00491897	12165	20067435	0.00060621
Bacteria_Elusimicrobia_Lineage_IIa	26	74	126	2234		3134	3739458	0.00083809	3208	10483103	0.00030602
Bacteria_Acetothermia_Acetothermiia	0	100	2	2234		0	0	0	53	211228	0.00025091
Bacteria_Elusimicrobia_Elusimicrobia	23	77	87	2234		5297	1637338	0.00323513	2801	7906853	0.00035425
Bacteria_Rokubacteria_NC10	29	71	352	2234		19586	7304791	0.00268125	15647	27174634	0.00057579
Bacteria_Dependentiae_Babeliae	20	80	356	2234		4665	5856589	0.00079654	8261	33711303	0.00024505
Bacteria_Latescibacteria_Latescibacteria	26	74	38	2234		780	874609	0.00089183	1288	3332764	0.00038647
Bacteria_WS1_NA	0	100	3	2234		0	0	0	193	382054	0.00050516
Bacteria_Atribacteria_Caldatribacteriia	0	100	3	2234		0	0	0	27	241544	0.00011178
Bacteria_Hydrogenedentes_Hydrogenedentia	23	77	43	2234		1159	805004	0.00143974	371	4034011	9.2e-05
Bacteria_Omnitrophicaeota_Omnitrophia	18	82	28	2234		137	568017	0.00024119	803	2736642	0.00029343
Bacteria_Calditrichaeota_Calditrichia	0	100	4	2234		0	0	0	174	382601	0.00045478
Bacteria_Coprothermobacteraeota_Coprothermobacteria	33	67	6	2234		317	142562	0.00222359	77	372128	0.00020692
Bacteria_Patescibacteria_Berkelbacteria	33	67	6	2234		35	197771	0.00017697	24	509670	4.71e-05
Archaea_Nanoarchaeaeota_NA	29	71	7	2234		121	300068	0.00040324	121	414114	0.00029219
Bacteria_GAL15_NA	64	36	11	2234		334	910406	0.00036687	168	265594	0.00063254
Bacteria_Margulisbacteria_NA	33	67	6	2234		673	65658	0.0102501	60	744070	8.06e-05
Archaea_Nanoarchaeaeota_Woesearchaeia	34	66	44	2234		3436	1402081	0.00245064	2071	2686078	0.00077101
Bacteria_Armatimonadetes_Chthonomonadetes	14	86	243	2234		1053	3258236	0.00032318	4067	25659867	0.0001585
Bacteria_Elusimicrobia_NA	0	100	3	2234		0	0	0	59	318045	0.00018551
Bacteria_Edwardsbacteria_NA	100	0	1	2234		3	256792	1.17e-05	0	0	0
Bacteria_Patescibacteria_CPR2	20	80	5	2234		12	70080	0.00017123	78	430496	0.00018119
Bacteria_Elusimicrobia_Lineage_IIb	24	76	86	2234		1492	1725726	0.00086456	1769	7546266	0.00023442
Bacteria_Patescibacteria_NA	14	86	130	2234		1533	1650959	0.00092855	1904	14379652	0.00013241
Bacteria_Patescibacteria_Parcubacteria	21	79	558	2234		13231	9726013	0.00136037	18399	50702557	0.00036288
Bacteria_Atribacteria_JS1	100	0	3	2234		177	467558	0.00037856	0	0	0
Bacteria_Patescibacteria_ABY1	18	82	88	2234		506	1560096	0.00032434	1274	8785995	0.000145
Bacteria_FCPU426_NA	22	78	23	2234		291	469480	0.00061983	462	1795960	0.00025724
Bacteria_Dadabacteria_Dadabacteriia	10	90	10	2234		106	50706	0.00209048	74	1015373	7.29e-05
Bacteria_Zixibacteria_NA	39	61	23	2234		1209	1026511	0.00117778	557	1819727	0.00030609
Bacteria_Cloacimonetes_Cloacimonadia	25	75	4	2234		40	96976	0.00041247	134	625001	0.0002144
Bacteria_AncK6_NA	100	0	2	2234		62	397519	0.00015597	0	0	0
Bacteria_Patescibacteria_Gracilibacteria	50	50	390	2234		14125	15498627	0.00091137	4441	22417504	0.0001981
Bacteria_Patescibacteria_Microgenomatia	19	81	100	2234		319	2006225	0.00015901	1113	9991636	0.00011139
Bacteria_WPS-2_NA	16	84	404	2234		3156	5135655	0.00061453	10328	37895128	0.00027254
Archaea_Nanoarchaeaeota_Nanohaloarchaeia	27	73	26	2234		1138	466615	0.00243884	2844	1698704	0.00167422
Archaea_Diapherotrites_Micrarchaeia	0	100	1	2234		0	0	0	5	190933	2.62e-05
Bacteria_WS4_NA	26	74	34	2234		1050	1029322	0.00102009	423	3732837	0.00011332
Bacteria_Nitrospinae_Nitrospinia	0	100	1	2234		0	0	0	5	320623	1.56e-05
Bacteria_Patescibacteria_Saccharimonadia	35	65	581	2234		3508	17969628	0.00019522	6413	47866610	0.00013398
Bacteria_Elusimicrobia_Endomicrobia	9	91	11	2234		76	26370	0.00288206	109	1068431	0.00010202
Bacteria_WOR-1_NA	0	100	1	2234		0	0	0	21	190933	0.00010999
Bacteria_Elusimicrobia_Lineage_IIc	37	63	19	2234		239	742994	0.00032167	846	1336131	0.00063317
Bacteria_RsaHf231_NA	11	89	103	2234		734	848604	0.00086495	6328	11743416	0.00053886
Bacteria_Patescibacteria_WWE3	0	100	6	2234		0	0	0	57	839628	6.79e-05
Bacteria_Omnitrophicaeota_NA	59	41	27	2234		1702	1670552	0.00101882	213	1452529	0.00014664
Bacteria_Caldiserica_Caldisericia	50	50	4	2234		7	95167	7.36e-05	21	247879	8.47e-05
Bacteria_PAUC34f_NA	50	50	2	2234		10	256792	3.89e-05	33	107037	0.0003083
Order
Bacteria_Acetothermia_Acetothermiia_NA	0	100	2	2234		0	0	0	53	211228	0.00025091
Bacteria_Patescibacteria_Parcubacteria_NA	19	81	389	2234		10990	6217537	0.00176758	10854	36977333	0.00029353
Bacteria_Patescibacteria_ABY1_Candidatus_Kerfeldbacteria	0	100	1	2234		0	0	0	11	125541	8.76e-05
Bacteria_Patescibacteria_Parcubacteria_Candidatus_Yonathbacteria	14	86	7	2234		22	108621	0.00020254	106	1051956	0.00010076
Bacteria_Rokubacteria_NC10_NA	0	100	1	2234		0	0	0	3	154016	1.95e-05
Bacteria_Elusimicrobia_Elusimicrobia_Elusimicrobiales	21	79	14	2234		276	135143	0.00204228	219	1011486	0.00021651
Bacteria_Hydrogenedentes_Hydrogenedentia_Hydrogenedentiales	23	77	43	2234		1159	805004	0.00143974	371	4034011	9.2e-05
Bacteria_Patescibacteria_NA_NA	14	86	130	2234		1533	1650959	0.00092855	1904	14379652	0.00013241
Bacteria_Patescibacteria_Parcubacteria_GWA2-38-13b	0	100	2	2234		0	0	0	5	260182	1.92e-05
Bacteria_Patescibacteria_ABY1_Candidatus_Komeilibacteria	0	100	1	2234		0	0	0	2	240918	8.3e-06
Bacteria_Patescibacteria_Parcubacteria_Candidatus_Kaiserbacteria	16	84	223	2234		1066	3059928	0.00034837	3378	22385388	0.0001509
Bacteria_Atribacteria_Caldatribacteriia_Caldatribacteriales	0	100	3	2234		0	0	0	27	241544	0.00011178
Bacteria_Edwardsbacteria_NA_NA	100	0	1	2234		3	256792	1.17e-05	0	0	0
Bacteria_Entotheonellaeota_Entotheonellia_Entotheonellales	25	75	360	2234		10541	6822947	0.00154493	9889	30259970	0.0003268
Bacteria_Patescibacteria_Gracilibacteria_Candidatus_Peregrinibacteria	0	100	2	2234		0	0	0	22	171177	0.00012852
Bacteria_Patescibacteria_Parcubacteria_Candidatus_Nomurabacteria	13	87	63	2234		181	923494	0.00019599	714	6834303	0.00010447
Bacteria_Margulisbacteria_NA_NA	33	67	6	2234		673	65658	0.0102501	60	744070	8.06e-05
Bacteria_Atribacteria_JS1_NA	100	0	3	2234		177	467558	0.00037856	0	0	0
Archaea_Diapherotrites_Micrarchaeia_NA	0	100	1	2234		0	0	0	5	190933	2.62e-05
Archaea_Nanoarchaeaeota_Woesearchaeia_NA	34	66	44	2234		3436	1402081	0.00245064	2071	2686078	0.00077101
Bacteria_WOR-1_NA_NA	0	100	1	2234		0	0	0	21	190933	0.00010999
Bacteria_Armatimonadetes_Fimbriimonadia_Fimbriimonadales	20	80	796	2234		17520	12252480	0.00142991	56000	66728282	0.00083922
Bacteria_Armatimonadetes_Chthonomonadetes_Chthonomonadales	14	86	243	2234		1053	3258236	0.00032318	4067	25659867	0.0001585
Bacteria_Rokubacteria_NC10_Methylomirabilales	27	73	11	2234		103	394158	0.00026132	460	1500658	0.00030653
Bacteria_Patescibacteria_ABY1_Candidatus_Uhrbacteria	19	81	21	2234		59	519128	0.00011365	140	2063282	6.79e-05
Bacteria_Patescibacteria_ABY1_Candidatus_Magasanikbacteria	14	86	28	2234		195	516220	0.00037775	354	2981151	0.00011875
Bacteria_Elusimicrobia_NA_NA	0	100	3	2234		0	0	0	59	318045	0.00018551
Bacteria_RsaHf231_NA_NA	11	89	103	2234		734	848604	0.00086495	6328	11743416	0.00053886
Bacteria_Coprothermobacteraeota_Coprothermobacteria_Coprothermobacterales	33	67	6	2234		317	142562	0.00222359	77	372128	0.00020692
Bacteria_GAL15_NA_NA	64	36	11	2234		334	910406	0.00036687	168	265594	0.00063254
Bacteria_Patescibacteria_Parcubacteria_Candidatus_Wolfebacteria	0	100	1	2234		0	0	0	19	127420	0.00014911
Bacteria_Patescibacteria_Gracilibacteria_Absconditabacteriales_(SR1)	58	42	245	2234		11806	11925080	0.00099001	2173	10815020	0.00020092
Bacteria_Patescibacteria_Parcubacteria_Candidatus_Adlerbacteria	18	82	22	2234		96	429931	0.00022329	164	2068674	7.93e-05
Bacteria_Patescibacteria_Microgenomatia_Candidatus_Amesbacteria	25	75	12	2234		98	305126	0.00032118	113	1125283	0.00010042
Bacteria_Nitrospinae_Nitrospinia_Nitrospinales	0	100	1	2234		0	0	0	5	320623	1.56e-05
Bacteria_Patescibacteria_Microgenomatia_Candidatus_Shapirobacteria	0	100	5	2234		0	0	0	40	869865	4.6e-05
Bacteria_Patescibacteria_Parcubacteria_32-520	0	100	1	2234		0	0	0	5	190933	2.62e-05
Bacteria_Patescibacteria_Parcubacteria_Candidatus_Doudnabacteria	17	83	29	2234		127	740731	0.00017145	454	2742697	0.00016553
Bacteria_Nitrospinae_P9X2b3D02_NA	33	67	12	2234		682	533854	0.0012775	985	1010090	0.00097516
Bacteria_Patescibacteria_ABY1_NA	21	79	29	2234		193	673825	0.00028642	598	3462071	0.00017273
Bacteria_Patescibacteria_ABY1_Candidatus_Falkowbacteria	20	80	15	2234		59	107715	0.00054774	169	999304	0.00016912
Bacteria_BRC1_NA_NA	11	89	352	2234		1658	3649412	0.00045432	12927	35537009	0.00036376
Bacteria_WS4_NA_NA	26	74	34	2234		1050	1029322	0.00102009	423	3732837	0.00011332
Bacteria_Elusimicrobia_Lineage_IIc_NA	37	63	19	2234		239	742994	0.00032167	846	1336131	0.00063317
Bacteria_Zixibacteria_NA_NA	39	61	23	2234		1209	1026511	0.00117778	557	1819727	0.00030609
Bacteria_Patescibacteria_Microgenomatia_Candidatus_Woesebacteria	19	81	26	2234		75	496015	0.00015121	129	2563040	5.03e-05
Bacteria_Patescibacteria_Gracilibacteria_NA	39	61	98	2234		1034	3346557	0.00030897	807	7111077	0.00011348
Bacteria_Patescibacteria_Parcubacteria_Candidatus_Moranbacteria	12	88	74	2234		117	869817	0.00013451	1181	7462714	0.00015825
Bacteria_Patescibacteria_Gracilibacteria_JGI_0000069-P22	53	47	101	2234		1142	4154666	0.00027487	979	6006670	0.00016299
Bacteria_Armatimonadetes_NA_NA	17	83	351	2234		2477	6370592	0.00038882	6424	35791723	0.00017948
Bacteria_Armatimonadetes_Armatimonadia_Armatimonadales	20	80	759	2234		7929	13402729	0.0005916	29147	64866940	0.00044934
Bacteria_Calditrichaeota_Calditrichia_Calditrichales	0	100	4	2234		0	0	0	174	382601	0.00045478
Bacteria_Patescibacteria_Microgenomatia_Candidatus_Roizmanbacteria	0	100	1	2234		0	0	0	2	80007	2.5e-05
Bacteria_FCPU426_NA_NA	22	78	23	2234		291	469480	0.00061983	462	1795960	0.00025724
Bacteria_Patescibacteria_Parcubacteria_Candidatus_Vogelbacteria	30	70	10	2234		201	213823	0.00094003	148	668601	0.00022136
Bacteria_Patescibacteria_Parcubacteria_Candidatus_Colwellbacteria	0	100	1	2234		0	0	0	3	73757	4.07e-05
Bacteria_Patescibacteria_CPR2_NA	20	80	5	2234		12	70080	0.00017123	78	430496	0.00018119
Bacteria_Patescibacteria_Parcubacteria_Candidatus_Azambacteria	20	80	20	2234		83	422210	0.00019658	138	2061046	6.7e-05
Archaea_Nanoarchaeaeota_NA_NA	29	71	7	2234		121	300068	0.00040324	121	414114	0.00029219
Bacteria_Patescibacteria_Parcubacteria_Candidatus_Jorgensenbacteria	25	75	4	2234		3	28909	0.00010377	20	336539	5.94e-05
Bacteria_Patescibacteria_Microgenomatia_NA	21	79	19	2234		27	280925	9.61e-05	114	1689479	6.75e-05
Bacteria_Patescibacteria_Parcubacteria_Candidatus_Lloydbacteria	0	100	4	2234		0	0	0	83	627423	0.00013229
Bacteria_Patescibacteria_Microgenomatia_Candidatus_Chisholmbacteria	0	100	1	2234		0	0	0	13	107037	0.00012145
Bacteria_Patescibacteria_Saccharimonadia_Saccharimonadales	35	65	581	2234		3508	17969628	0.00019522	6413	47866610	0.00013398
Bacteria_Patescibacteria_WWE3_NA	0	100	6	2234		0	0	0	57	839628	6.79e-05
Bacteria_Patescibacteria_Parcubacteria_Candidatus_Yanofskybacteria	24	76	17	2234		113	365431	0.00030922	287	1887525	0.00015205
Bacteria_PAUC34f_NA_NA	50	50	2	2234		10	256792	3.89e-05	33	107037	0.0003083
Bacteria_Patescibacteria_Microgenomatia_Candidatus_Collierbacteria	20	80	5	2234		2	195709	1.02e-05	60	875325	6.85e-05
Bacteria_Patescibacteria_Microgenomatia_Candidatus_Pacebacteria	13	87	39	2234		50	503721	9.93e-05	469	4437543	0.00010569
Bacteria_Patescibacteria_Microgenomatia_Candidatus_Gottesmanbacteria	0	100	4	2234		0	0	0	41	695359	5.9e-05
Bacteria_Patescibacteria_Parcubacteria_Candidatus_Campbellbacteria	31	69	16	2234		123	303133	0.00040576	91	1130715	8.05e-05
Bacteria_Latescibacteria_NA_NA	29	71	264	2234		26787	5445647	0.00491897	12165	20067435	0.00060621
Bacteria_Patescibacteria_Gracilibacteria_Candidatus_Peribacteria	21	79	42	2234		143	586611	0.00024377	460	4284509	0.00010736
Bacteria_Dependentiae_Babeliae_Babeliales	20	80	356	2234		4665	5856589	0.00079654	8261	33711303	0.00024505
Bacteria_Omnitrophicaeota_Omnitrophia_Omnitrophales	18	82	28	2234		137	568017	0.00024119	803	2736642	0.00029343
Bacteria_Dadabacteria_Dadabacteriia_Dadabacteriales	10	90	10	2234		106	50706	0.00209048	74	1015373	7.29e-05
Bacteria_WS1_NA_NA	0	100	3	2234		0	0	0	193	382054	0.00050516
Bacteria_Patescibacteria_Microgenomatia_Candidatus_Daviesbacteria	38	63	8	2234		65	319527	0.00020343	79	598107	0.00013208
Bacteria_Patescibacteria_Parcubacteria_Candidatus_Terrybacteria	0	100	2	2234		0	0	0	8	273383	2.93e-05
Bacteria_Latescibacteria_Latescibacteria_Latescibacterales	26	74	38	2234		780	874609	0.00089183	1288	3332764	0.00038647
Bacteria_Elusimicrobia_Elusimicrobia_Lineage_IV	26	74	54	2234		4631	1180257	0.00392372	2154	5003775	0.00043047
Bacteria_Omnitrophicaeota_NA_NA	59	41	27	2234		1702	1670552	0.00101882	213	1452529	0.00014664
Bacteria_Patescibacteria_Berkelbacteria_NA	33	67	6	2234		35	197771	0.00017697	24	509670	4.71e-05
Bacteria_Cloacimonetes_Cloacimonadia_Cloacimonadales	25	75	4	2234		40	96976	0.00041247	134	625001	0.0002144
Archaea_Nanoarchaeaeota_Nanohaloarchaeia_Nanohaloarchaeales	27	73	26	2234		1138	466615	0.00243884	2844	1698704	0.00167422
Bacteria_Patescibacteria_Parcubacteria_Candidatus_Zambryskibacteria	13	87	55	2234		109	839196	0.00012989	680	5263691	0.00012919
Bacteria_AncK6_NA_NA	100	0	2	2234		62	397519	0.00015597	0	0	0
Bacteria_WPS-2_NA_NA	16	84	404	2234		3156	5135655	0.00061453	10328	37895128	0.00027254
Bacteria_Elusimicrobia_Endomicrobia_Endomicrobiales	9	91	11	2234		76	26370	0.00288206	109	1068431	0.00010202
Bacteria_Caldiserica_Caldisericia_Caldisericales	50	50	4	2234		7	95167	7.36e-05	21	247879	8.47e-05
Bacteria_Elusimicrobia_Lineage_IIa_NA	26	74	126	2234		3134	3739458	0.00083809	3208	10483103	0.00030602
Bacteria_WS2_NA_NA	31	69	16	2234		272	701272	0.00038787	122	1692150	7.21e-05
Bacteria_Patescibacteria_Parcubacteria_Candidatus_Ryanbacteria	0	100	1	2234		0	0	0	2	148013	1.35e-05
Bacteria_Patescibacteria_Microgenomatia_Candidatus_Woykebacteria	20	80	5	2234		2	256792	7.79e-06	53	351372	0.00015084
Bacteria_Elusimicrobia_Elusimicrobia_MVP-88	24	76	25	2234		390	739224	0.00052758	428	2059265	0.00020784
Bacteria_Patescibacteria_Parcubacteria_Candidatus_Staskawiczbacteria	0	100	6	2234		0	0	0	59	667966	8.83e-05
Bacteria_Elusimicrobia_Lineage_IIb_NA	24	76	86	2234		1492	1725726	0.00086456	1769	7546266	0.00023442
Bacteria_Rokubacteria_NC10_Rokubacteriales	29	71	349	2234		19483	7167425	0.00271827	15184	27020618	0.00056194
Family
Bacteria_Patescibacteria_Parcubacteria_Candidatus_Campbellbacteria_NA	31	69	16	2234		123	303133	0.00040576	91	1130715	8.05e-05
Bacteria_PAUC34f_NA_NA_NA	50	50	2	2234		10	256792	3.89e-05	33	107037	0.0003083
Bacteria_AncK6_NA_NA_NA	100	0	2	2234		62	397519	0.00015597	0	0	0
Bacteria_WS4_NA_NA_NA	26	74	34	2234		1050	1029322	0.00102009	423	3732837	0.00011332
Bacteria_Patescibacteria_Parcubacteria_Candidatus_Moranbacteria_NA	12	88	74	2234		117	869817	0.00013451	1181	7462714	0.00015825
Bacteria_Armatimonadetes_Fimbriimonadia_Fimbriimonadales_NA	5	95	66	2234		28	313901	8.92e-05	1197	8623331	0.00013881
Bacteria_Cloacimonetes_Cloacimonadia_Cloacimonadales_MSBL8	100	0	1	2234		40	96976	0.00041247	0	0	0
Bacteria_Patescibacteria_Gracilibacteria_Candidatus_Peregrinibacteria_NA	0	100	2	2234		0	0	0	22	171177	0.00012852
Bacteria_Atribacteria_JS1_NA_NA	100	0	3	2234		177	467558	0.00037856	0	0	0
Bacteria_Patescibacteria_Parcubacteria_Candidatus_Kaiserbacteria_NA	16	84	223	2234		1066	3059928	0.00034837	3378	22385388	0.0001509
Bacteria_WPS-2_NA_NA_NA	16	84	404	2234		3156	5135655	0.00061453	10328	37895128	0.00027254
Bacteria_Hydrogenedentes_Hydrogenedentia_Hydrogenedentiales_Hydrogenedensaceae	23	77	43	2234		1159	805004	0.00143974	371	4034011	9.2e-05
Bacteria_Patescibacteria_Microgenomatia_Candidatus_Pacebacteria_NA	13	87	39	2234		50	503721	9.93e-05	469	4437543	0.00010569
Bacteria_Armatimonadetes_Chthonomonadetes_Chthonomonadales_Chthonomonadaceae	10	90	185	2234		443	1898431	0.00023335	3089	20924593	0.00014763
Bacteria_Patescibacteria_ABY1_NA_NA	21	79	29	2234		193	673825	0.00028642	598	3462071	0.00017273
Bacteria_Cloacimonetes_Cloacimonadia_Cloacimonadales_Cloacimonadaceae	0	100	2	2234		0	0	0	46	267741	0.00017181
Bacteria_Patescibacteria_Microgenomatia_Candidatus_Woykebacteria_NA	20	80	5	2234		2	256792	7.79e-06	53	351372	0.00015084
Bacteria_Patescibacteria_Microgenomatia_Candidatus_Amesbacteria_NA	25	75	12	2234		98	305126	0.00032118	113	1125283	0.00010042
Bacteria_Patescibacteria_Parcubacteria_Candidatus_Vogelbacteria_NA	30	70	10	2234		201	213823	0.00094003	148	668601	0.00022136
Bacteria_Patescibacteria_Microgenomatia_Candidatus_Daviesbacteria_NA	38	63	8	2234		65	319527	0.00020343	79	598107	0.00013208
Bacteria_Patescibacteria_Gracilibacteria_JGI_0000069-P22_NA	53	47	101	2234		1142	4154666	0.00027487	979	6006670	0.00016299
Bacteria_Caldiserica_Caldisericia_Caldisericales_WCHB1-02	0	100	1	2234		0	0	0	15	190933	7.86e-05
Bacteria_Patescibacteria_Microgenomatia_Candidatus_Collierbacteria_NA	20	80	5	2234		2	195709	1.02e-05	60	875325	6.85e-05
Bacteria_Patescibacteria_Microgenomatia_Candidatus_Roizmanbacteria_NA	0	100	1	2234		0	0	0	2	80007	2.5e-05
Bacteria_Armatimonadetes_Fimbriimonadia_Fimbriimonadales_Fimbriimonadaceae	20	80	790	2234		17492	12209115	0.0014327	54803	66427846	0.000825
Bacteria_Patescibacteria_Microgenomatia_Candidatus_Woesebacteria_NA	19	81	26	2234		75	496015	0.00015121	129	2563040	5.03e-05
Bacteria_Dependentiae_Babeliae_Babeliales_UBA12411	33	67	3	2234		22	81066	0.00027138	46	220924	0.00020822
Bacteria_Patescibacteria_Saccharimonadia_Saccharimonadales_Saccharimonadaceae	54	46	226	2234		1742	11367205	0.00015325	1116	13966523	7.99e-05
Bacteria_Patescibacteria_Parcubacteria_Candidatus_Staskawiczbacteria_NA	0	100	6	2234		0	0	0	59	667966	8.83e-05
Bacteria_Dependentiae_Babeliae_Babeliales_UBA12409	18	83	40	2234		1136	959943	0.0011834	915	3951190	0.00023158
Bacteria_Rokubacteria_NC10_NA_NA	0	100	1	2234		0	0	0	3	154016	1.95e-05
Bacteria_Coprothermobacteraeota_Coprothermobacteria_Coprothermobacterales_Coprothermobacteraceae	33	67	6	2234		317	142562	0.00222359	77	372128	0.00020692
Bacteria_Patescibacteria_Parcubacteria_Candidatus_Azambacteria_NA	20	80	20	2234		83	422210	0.00019658	138	2061046	6.7e-05
Bacteria_Zixibacteria_NA_NA_NA	39	61	23	2234		1209	1026511	0.00117778	557	1819727	0.00030609
Bacteria_Latescibacteria_NA_NA_NA	29	71	264	2234		26787	5445647	0.00491897	12165	20067435	0.00060621
Bacteria_Cloacimonetes_Cloacimonadia_Cloacimonadales_NA	0	100	1	2234		0	0	0	88	357260	0.00024632
Bacteria_Elusimicrobia_Endomicrobia_Endomicrobiales_Endomicrobiaceae	9	91	11	2234		76	26370	0.00288206	109	1068431	0.00010202
Bacteria_Elusimicrobia_Lineage_IIb_NA_NA	24	76	86	2234		1492	1725726	0.00086456	1769	7546266	0.00023442
Bacteria_Patescibacteria_WWE3_NA_NA	0	100	6	2234		0	0	0	57	839628	6.79e-05
Bacteria_Armatimonadetes_NA_NA_NA	17	83	351	2234		2477	6370592	0.00038882	6424	35791723	0.00017948
Bacteria_Dependentiae_Babeliae_Babeliales_Vermiphilaceae	23	77	172	2234		1613	3260563	0.0004947	2890	15834994	0.00018251
Archaea_Diapherotrites_Micrarchaeia_NA_NA	0	100	1	2234		0	0	0	5	190933	2.62e-05
Bacteria_Patescibacteria_Berkelbacteria_NA_NA	33	67	6	2234		35	197771	0.00017697	24	509670	4.71e-05
Bacteria_Elusimicrobia_Lineage_IIc_NA_NA	37	63	19	2234		239	742994	0.00032167	846	1336131	0.00063317
Bacteria_Patescibacteria_Gracilibacteria_Candidatus_Peribacteria_NA	21	79	42	2234		143	586611	0.00024377	460	4284509	0.00010736
Bacteria_Patescibacteria_Parcubacteria_32-520_NA	0	100	1	2234		0	0	0	5	190933	2.62e-05
Archaea_Nanoarchaeaeota_NA_NA_NA	29	71	7	2234		121	300068	0.00040324	121	414114	0.00029219
Bacteria_Nitrospinae_P9X2b3D02_NA_NA	33	67	12	2234		682	533854	0.0012775	985	1010090	0.00097516
Bacteria_Patescibacteria_Parcubacteria_Candidatus_Lloydbacteria_NA	0	100	4	2234		0	0	0	83	627423	0.00013229
Bacteria_Patescibacteria_Microgenomatia_NA_NA	21	79	19	2234		27	280925	9.61e-05	114	1689479	6.75e-05
Bacteria_WS1_NA_NA_NA	0	100	3	2234		0	0	0	193	382054	0.00050516
Bacteria_Patescibacteria_Saccharimonadia_Saccharimonadales_NA	24	76	429	2234		1766	9809886	0.00018002	5297	42629464	0.00012426
Bacteria_Entotheonellaeota_Entotheonellia_Entotheonellales_Entotheonellaceae	25	75	360	2234		10541	6822947	0.00154493	9889	30259970	0.0003268
Bacteria_Patescibacteria_Parcubacteria_Candidatus_Nomurabacteria_NA	13	87	63	2234		181	923494	0.00019599	714	6834303	0.00010447
Bacteria_Patescibacteria_Microgenomatia_Candidatus_Gottesmanbacteria_NA	0	100	4	2234		0	0	0	41	695359	5.9e-05
Bacteria_Armatimonadetes_Armatimonadia_Armatimonadales_Armatimonadaceae	22	78	144	2234		1792	3617928	0.00049531	3298	14377813	0.00022938
Bacteria_Dependentiae_Babeliae_Babeliales_NA	17	83	153	2234		1713	1956385	0.00087559	2651	15168351	0.00017477
Bacteria_Elusimicrobia_Elusimicrobia_Elusimicrobiales_Elusimicrobiaceae	21	79	14	2234		276	135143	0.00204228	219	1011486	0.00021651
Bacteria_Patescibacteria_Gracilibacteria_Absconditabacteriales_(SR1)_NA	58	42	245	2234		11806	11925080	0.00099001	2173	10815020	0.00020092
Bacteria_Patescibacteria_Parcubacteria_NA_NA	19	81	389	2234		10990	6217537	0.00176758	10854	36977333	0.00029353
Bacteria_Armatimonadetes_Armatimonadia_Armatimonadales_NA	18	82	709	2234		6137	11520036	0.00053272	25849	61976179	0.00041708
Bacteria_Patescibacteria_Parcubacteria_Candidatus_Zambryskibacteria_NA	13	87	55	2234		109	839196	0.00012989	680	5263691	0.00012919
Bacteria_Rokubacteria_NC10_Methylomirabilales_Methylomirabilaceae	27	73	11	2234		103	394158	0.00026132	460	1500658	0.00030653
Bacteria_Patescibacteria_Parcubacteria_Candidatus_Wolfebacteria_NA	0	100	1	2234		0	0	0	19	127420	0.00014911
Bacteria_Patescibacteria_Parcubacteria_Candidatus_Jorgensenbacteria_NA	25	75	4	2234		3	28909	0.00010377	20	336539	5.94e-05
Bacteria_Caldiserica_Caldisericia_Caldisericales_Caldisericaceae	50	50	4	2234		7	95167	7.36e-05	6	247879	2.42e-05
Bacteria_Margulisbacteria_NA_NA_NA	33	67	6	2234		673	65658	0.0102501	60	744070	8.06e-05
Bacteria_Patescibacteria_ABY1_Candidatus_Komeilibacteria_NA	0	100	1	2234		0	0	0	2	240918	8.3e-06
Bacteria_BRC1_NA_NA_NA	11	89	352	2234		1658	3649412	0.00045432	12927	35537009	0.00036376
Bacteria_Elusimicrobia_Elusimicrobia_Lineage_IV_NA	26	74	54	2234		4631	1180257	0.00392372	2154	5003775	0.00043047
Bacteria_Omnitrophicaeota_NA_NA_NA	59	41	27	2234		1702	1670552	0.00101882	213	1452529	0.00014664
Bacteria_Dependentiae_Babeliae_Babeliales_Babeliaceae	12	88	73	2234		181	1407372	0.00012861	1759	8498730	0.00020697
Bacteria_RsaHf231_NA_NA_NA	11	89	103	2234		734	848604	0.00086495	6328	11743416	0.00053886
Bacteria_Patescibacteria_Parcubacteria_Candidatus_Adlerbacteria_NA	18	82	22	2234		96	429931	0.00022329	164	2068674	7.93e-05
Bacteria_Patescibacteria_CPR2_NA_NA	20	80	5	2234		12	70080	0.00017123	78	430496	0.00018119
Bacteria_Dadabacteria_Dadabacteriia_Dadabacteriales_NA	10	90	10	2234		106	50706	0.00209048	74	1015373	7.29e-05
Bacteria_GAL15_NA_NA_NA	64	36	11	2234		334	910406	0.00036687	168	265594	0.00063254
Bacteria_Latescibacteria_Latescibacteria_Latescibacterales_Latescibacteraceae	26	74	38	2234		780	874609	0.00089183	1288	3332764	0.00038647
Bacteria_Armatimonadetes_Chthonomonadetes_Chthonomonadales_NA	21	79	84	2234		610	1650612	0.00036956	978	8694033	0.00011249
Bacteria_Patescibacteria_Parcubacteria_Candidatus_Ryanbacteria_NA	0	100	1	2234		0	0	0	2	148013	1.35e-05
Bacteria_Rokubacteria_NC10_Rokubacteriales_NA	29	71	349	2234		19483	7167425	0.00271827	15184	27020618	0.00056194
Bacteria_Nitrospinae_Nitrospinia_Nitrospinales_Nitrospinaceae	0	100	1	2234		0	0	0	5	320623	1.56e-05
Bacteria_WS2_NA_NA_NA	31	69	16	2234		272	701272	0.00038787	122	1692150	7.21e-05
Bacteria_Patescibacteria_Parcubacteria_Candidatus_Yanofskybacteria_NA	24	76	17	2234		113	365431	0.00030922	287	1887525	0.00015205
Bacteria_Patescibacteria_Microgenomatia_Candidatus_Chisholmbacteria_NA	0	100	1	2234		0	0	0	13	107037	0.00012145
Bacteria_Patescibacteria_NA_NA_NA	14	86	130	2234		1533	1650959	0.00092855	1904	14379652	0.00013241
Bacteria_Omnitrophicaeota_Omnitrophia_Omnitrophales_Omnitrophaceae	18	82	28	2234		137	568017	0.00024119	803	2736642	0.00029343
Bacteria_FCPU426_NA_NA_NA	22	78	23	2234		291	469480	0.00061983	462	1795960	0.00025724
Bacteria_Patescibacteria_Parcubacteria_Candidatus_Terrybacteria_NA	0	100	2	2234		0	0	0	8	273383	2.93e-05
Bacteria_Patescibacteria_Gracilibacteria_NA_NA	39	61	98	2234		1034	3346557	0.00030897	807	7111077	0.00011348
Bacteria_Patescibacteria_Parcubacteria_Candidatus_Colwellbacteria_NA	0	100	1	2234		0	0	0	3	73757	4.07e-05
Bacteria_Patescibacteria_Parcubacteria_GWA2-38-13b_NA	0	100	2	2234		0	0	0	5	260182	1.92e-05
Bacteria_Elusimicrobia_NA_NA_NA	0	100	3	2234		0	0	0	59	318045	0.00018551
Bacteria_Acetothermia_Acetothermiia_NA_NA	0	100	2	2234		0	0	0	53	211228	0.00025091
Bacteria_Patescibacteria_ABY1_Candidatus_Magasanikbacteria_NA	14	86	28	2234		195	516220	0.00037775	354	2981151	0.00011875
Bacteria_WOR-1_NA_NA_NA	0	100	1	2234		0	0	0	21	190933	0.00010999
Bacteria_Elusimicrobia_Elusimicrobia_MVP-88_NA	24	76	25	2234		390	739224	0.00052758	428	2059265	0.00020784
Bacteria_Patescibacteria_ABY1_Candidatus_Kerfeldbacteria_NA	0	100	1	2234		0	0	0	11	125541	8.76e-05
Bacteria_Patescibacteria_ABY1_Candidatus_Uhrbacteria_NA	19	81	21	2234		59	519128	0.00011365	140	2063282	6.79e-05
Bacteria_Patescibacteria_ABY1_Candidatus_Falkowbacteria_NA	20	80	15	2234		59	107715	0.00054774	169	999304	0.00016912
Bacteria_Patescibacteria_Microgenomatia_Candidatus_Shapirobacteria_NA	0	100	5	2234		0	0	0	40	869865	4.6e-05
Bacteria_Calditrichaeota_Calditrichia_Calditrichales_Calditrichaceae	0	100	4	2234		0	0	0	174	382601	0.00045478
Bacteria_Patescibacteria_Parcubacteria_Candidatus_Yonathbacteria_NA	14	86	7	2234		22	108621	0.00020254	106	1051956	0.00010076
Archaea_Nanoarchaeaeota_Woesearchaeia_NA_NA	34	66	44	2234		3436	1402081	0.00245064	2071	2686078	0.00077101
Bacteria_Patescibacteria_Parcubacteria_Candidatus_Doudnabacteria_NA	17	83	29	2234		127	740731	0.00017145	454	2742697	0.00016553
Bacteria_Atribacteria_Caldatribacteriia_Caldatribacteriales_Caldatribacteriaceae	0	100	3	2234		0	0	0	27	241544	0.00011178
Bacteria_Elusimicrobia_Lineage_IIa_NA_NA	26	74	126	2234		3134	3739458	0.00083809	3208	10483103	0.00030602
Archaea_Nanoarchaeaeota_Nanohaloarchaeia_Nanohaloarchaeales_Nanohaloarchaeaceae	27	73	26	2234		1138	466615	0.00243884	2844	1698704	0.00167422
Bacteria_Edwardsbacteria_NA_NA_NA	100	0	1	2234		3	256792	1.17e-05	0	0	0
